# Supplementary material for: Schistosoma japonicum Infection in Treg-Specific USP21 Knockout Mice
Source: Hindawi journal article supplement (doi:10.1155/2021/6613162), 2021-02-09
Supplement: f1 [file 6613162.f1.pdf]

**Table S1. Number of mice used in each test**

| ID | Test                                                                                                                               | Number of mice used                                                  | Figure number  |
|----|------------------------------------------------------------------------------------------------------------------------------------|----------------------------------------------------------------------|----------------|
| 1  | Collection of <i>S. japonicum</i> worms and weight of the spleen and liver of the infected mice                                    | N=28 for WT-INF,<br>N=24 for KO-INF,<br>N=2 for both WT-NC and KO-NC | Fig. 1         |
| 2  | HE staining for the average number of eggs in liver and liver egg granuloma areas                                                  | N=10 for both WT-INF and KO-INF,<br>N=2 for both WT-NC and KO-NC     | Fig. 2         |
| 3  | Masson staining for tests the degree of hepatic fibrosis                                                                           | N=10 for both WT-INF and KO-INF,<br>N=2 for both WT-NC and KO-NC     | Fig. 3a and 3b |
| 5  | RT-PCR study for the expression of $\alpha$ -SMA, collagen-I and collagen-III (Liver)                                              | N=10 for both WT-INF and KO-INF,<br>N=2 for both WT-NC and KO-NC     | Fig. 3c        |
| 6  | Western Blotting for the expression of $\alpha$ -SMA, collagen-I and collagen-III (Liver)                                          | N=10 for both WT-INF and KO-INF,<br>N=2 for both WT-NC and KO-NC     | Fig. 3d and 3e |
| 7  | Western Blotting for USP21 expression                                                                                              | N=6 for both WT-INF and KO-INF,<br>N=2 for both WT-NC and KO-NC      | Fig. 4a and 4b |
| 8  | RT-PCR study for the expression of FOXP3, IL-10, IL-17 and USP21(Liver)                                                            | N=6 for both WT-INF and KO-INF,<br>N=2 for both WT-NC and KO-NC      | Fig. 4c and 4d |
| 9  | Flow cytometry analysis                                                                                                            | N=4 for both WT-INF and KO-INF,<br>N=2 for both WT-NC and KO-NC      | Fig. 5a        |
| 10 | RT-PCR study for the expression of FOXP3, IL-10, IL-17 and USP21 (Spleen)                                                          | N=10 for both WT-INF and KO-INF,<br>N=2 for both WT-NC and KO-NC     | Fig. 5b        |
| 11 | Multiplex Fluorescent Microsphere Immunoassay for tests the contents of IFN-gamma, IL-4, IL-10, IL-17A, IL-23 and IL-9 in cultured | N=6 for both WT-INF and KO-INF,<br>N=2 for both WT-NC and KO-NC      | Fig. 5c        |

|    |                                                                                                                                                                        |                                                                      |         |
|----|------------------------------------------------------------------------------------------------------------------------------------------------------------------------|----------------------------------------------------------------------|---------|
|    | spleen cells                                                                                                                                                           |                                                                      |         |
| 12 | ELISA test (measure the content of anti-SEA and anti-SWAP IgG/IgM antibodies during the different stages of infection).                                                | N=28 for WT-INF,<br>N=24 for KO-INF,<br>N=2 for both WT-NC and KO-NC | Fig. 6  |
| 13 | Multiplex Fluorescent Microsphere Immunoassay for tests the contents of IFN-gamma, IL-4, IL-10, IL-17A, IL-23 and IL-9 in the cultures of peripheral blood lymphocytes | N=10 for both WT-INF and KO-INF,<br>N=2 for both WT-NC and KO-NC     | Fig. 7a |
| 14 | Multiplex Fluorescent Microsphere Immunoassay for tests the contents of IFN-gamma, IL-4, IL-10, IL-17A, IL-23 and IL-9 in the the serum at different times             | N=28 for WT-INF,<br>N=24 for KO-INF,<br>N=2 for both WT-NC and KO-NC | Fig. 7b |

WT, FOXP3<sup>Cre</sup> mice; KO, USP21<sup>fl/fl</sup>FOXP3<sup>Cre</sup> mice.
